# Supplementary material for: Burnout Syndrome among Otorhinolaryngologists during the COVID-19 Pandemic
Source: MDPI journal article supplement (doi:10.3390/medicina58081089), 2022-08-12
Supplement: s1 [file s1]

**Table S1.** The distribution of MBI results in both groups.

| Subscale                |    | ITEM                                                                                 | Distribution On Five Point Likert Scale* |                           |                              |                           |                                                |                           |                           |                           |                                    |                           |
|-------------------------|----|--------------------------------------------------------------------------------------|------------------------------------------|---------------------------|------------------------------|---------------------------|------------------------------------------------|---------------------------|---------------------------|---------------------------|------------------------------------|---------------------------|
|                         |    |                                                                                      | Strongly disagree, n <sup>2</sup> (%)    |                           | Disagree, n <sup>2</sup> (%) |                           | Neither agree nor disagree, n <sup>2</sup> (%) |                           | Agree, n <sup>2</sup> (%) |                           | Strongly agree, n <sup>2</sup> (%) |                           |
|                         |    |                                                                                      | ORL <sup>1</sup> group                   | Contr <sup>ol</sup> group | ORL <sup>1</sup> group       | Contr <sup>ol</sup> group | ORL <sup>1</sup> group                         | Contr <sup>ol</sup> group | ORL <sup>1</sup> group    | Contr <sup>ol</sup> group | ORL <sup>1</sup> group             | Contr <sup>ol</sup> group |
| Emotional Exhaustion    | 1  | I feel emotionally drained from my work                                              | 6 (7.5)                                  | 9 (30.0)                  | 20 (25.0)                    | 19 (63.4)                 | 24 (30.0)                                      | 1 (3.3)                   | 28 (35.0)                 | 1 (3.3)                   | 2 (2.5)                            | 0 (0.0)                   |
|                         | 2  | I feel used up at the end of the workday                                             | 5 (6.2)                                  | 13 (43.4)                 | 30 (37.5)                    | 15 (50.0)                 | 23 (28.8)                                      | 1 (3.3)                   | 21 (26.3)                 | 1 (3.3)                   | 1 (1.2)                            | 0 (0.0)                   |
|                         | 3  | I feel fatigued when I get up in the morning and have to face another day on the job | 5 (6.2)                                  | 8 (26.7)                  | 25 (31.3)                    | 15 (50.0)                 | 29 (36.3)                                      | 7 (23.3)                  | 20 (25.0)                 | 0 (0.0)                   | 1 (1.2)                            | 0 (0.0)                   |
|                         | 6  | Working with people all day is really a strain for me                                | 5 (6.2)                                  | 9 (30.0)                  | 30 (37.5)                    | 13 (43.4)                 | 23 (28.8)                                      | 7 (23.3)                  | 21 (26.3)                 | 1 (3.3)                   | 1 (1.2)                            | 0 (0.0)                   |
|                         | 8  | I feel burned out from my work                                                       | 19 (23.8)                                | 7 (23.3)                  | 32 (40.0)                    | 19 (63.4)                 | 21 (26.3)                                      | 3 (10.0)                  | 7 (8.7)                   | 1 (3.3)                   | 1 (1.2)                            | 0 (0.0)                   |
|                         | 13 | I feel frustrated by my job                                                          | 10 (12.5)                                | 8 (26.6)                  | 26 (32.5)                    | 19 (63.4)                 | 32 (40.0)                                      | 3 (10)                    | 12 (15.0)                 | 0 (0.0)                   | 0 (0.0)                            | 0 (0.0)                   |
|                         | 14 | I feel I'm working too hard on my job                                                | 18 (22.5)                                | 7 (23.3)                  | 35 (43.7)                    | 14 (46.7)                 | 17 (21.3)                                      | 7 (23.3)                  | 9 (11.3)                  | 2 (6.7)                   | 1 (1.2)                            | 0 (0.0)                   |
|                         | 16 | Working with people directly puts too much stress on me                              | 18 (22.5)                                | 23 (76.7)                 | 35 (43.7)                    | 6 (20.0)                  | 18 (22.5)                                      | 1 (3.3)                   | 9 (11.3)                  | 0 (0.0)                   | 0 (0.0)                            | 0 (0.0)                   |
|                         | 20 | I feel as if I'm at my wits' end                                                     | 9 (11.3)                                 | 9 (30.0)                  | 17 (21.2)                    | 19 (63.4)                 | 22 (27.5)                                      | 1 (3.3)                   | 24 (30.0)                 | 1 (3.3)                   | 8 (10.0)                           | 0 (0.0)                   |
| Depersonalisation scale | 5  | I feel I treat some patients/clients as if they were impersonal objects              | 19 (23.8)                                | 15 (50.0)                 | 37 (46.3)                    | 7 (23.3)                  | 14 (17.5)                                      | 8 (26.7)                  | 8 (10.0)                  | 0 (0.0)                   | 2 (2.4)                            | 0 (0.0)                   |
|                         | 10 | I've become more callous toward people since I took this job                         | 22 (27.5)                                | 12 (40.0)                 | 35 (43.7)                    | 17 (56.7)                 | 11 (13.8)                                      | 1 (3.3)                   | 9 (11.3)                  | 0 (0.0)                   | 3 (3.7)                            | 0 (0.0)                   |
|                         | 11 | I worry that this job is hardening me emotionally                                    | 24 (30.0)                                | 16 (53.3)                 | 44 (55.0)                    | 13 (43.4)                 | 9 (11.3)                                       | 0 (0.0)                   | 3 (3.7)                   | 0 (0.0)                   | 0 (0.0)                            | 1 (3.3)                   |
|                         | 15 | I don't really care what happens to some patients/clients                            | 11 (13.8)                                | 15 (50.0)                 | 28 (35.0)                    | 8 (26.7)                  | 25 (31.2)                                      | 7 (23.3)                  | 16 (20.0)                 | 0 (0.0)                   | 0 (0.0)                            | 0 (0.0)                   |
|                         | 22 | I feel patients/clients blame me for some of their problems                          | 1 (1.2)                                  | 6 (20.0)                  | 7 (8.7)                      | 6 (20.0)                  | 17 (21.3)                                      | 11 (36.7)                 | 49 (61.3)                 | 6 (20.0)                  | 6 (7.5)                            | 1 (3.3)                   |
| Personal achievement    | 4  | I can easily understand how my patients/clients feel about things                    | 1 (1.2)                                  | 0 (0.0)                   | 8 (10.0)                     | 0 (0.0)                   | 21 (26.4)                                      | 1 (3.3)                   | 48 (60.0)                 | 20 (66.7)                 | 2 (2.4)                            | 9 (30.0)                  |
|                         | 7  | I deal very effectively with the problems of my patients/clients                     | 3 (3.7)                                  | 0 (0.0)                   | 5 (6.3)                      | 0 (0.0)                   | 20 (25.0)                                      | 0 (0.0)                   | 46 (57.5)                 | 16 (53.3)                 | 6 (7.5)                            | 14 (46.7)                 |
|                         | 9  | I feel I'm positively influencing other people's lives through my work               | 6 (7.5)                                  | 0 (0.0)                   | 20 (25.0)                    | 0 (0.0)                   | 33 (41.3)                                      | 1 (3.3)                   | 18 (22.5)                 | 19 (63.4)                 | 3 (3.7)                            | 10 (33.3)                 |
|                         | 12 | I feel very energetic                                                                | 2 (2.4)                                  | 0 (0.0)                   | 15 (18.8)                    | 0 (0.0)                   | 29 (36.3)                                      | 1 (3.3)                   | 28 (35.0)                 | 15 (50.0)                 | 6 (7.5)                            | 14 (46.7)                 |
|                         | 17 | I can easily create a relaxed atmosphere                                             | 3 (3.7)                                  | 0 (0.0)                   | 14 (17.5)                    | 0 (0.0)                   | 18 (22.5)                                      | 4 (13.3)                  | 39 (48.8)                 | 14 (46.7)                 | 6 (7.5)                            | 12 (40.0)                 |

|    |  |                                                                   |            |            |              |            |              |             |              |              |            |              |
|----|--|-------------------------------------------------------------------|------------|------------|--------------|------------|--------------|-------------|--------------|--------------|------------|--------------|
|    |  | with my patients/clients                                          |            |            |              |            |              |             |              |              |            |              |
| 18 |  | I feel exhilarated after working closely with my patients/clients | 3<br>(3.7) | 0<br>(0.0) | 10<br>(12.5) | 0<br>(0.0) | 20<br>(25.0) | 1<br>(3.3)  | 43<br>(53.8) | 11<br>(36.7) | 4<br>(5.0) | 18<br>(60.0) |
| 19 |  | I have accomplished many worthwhile things in this job            | 6<br>(7.5) | 0<br>(0.0) | 15<br>(18.8) | 0<br>(0.0) | 28<br>(35.0) | 4<br>(13.3) | 26<br>(32.5) | 14<br>(46.7) | 5<br>(6.2) | 12<br>(40.0) |
| 21 |  | In my work, I deal with emotional problems very calmly            | 6<br>(7.5) | 0<br>(0.0) | 20<br>(25.0) | 0<br>(0.0) | 33<br>(41.3) | 1<br>(3.3)  | 18<br>(22.5) | 11<br>(36.7) | 3<br>(3.7) | 18<br>(60.0) |

<sup>1</sup>ORL: otorhinolaryngologists group; <sup>2</sup>n: number of subjects, \*: the ORL group was composed of 80 subjects and the Control group of 30 subjects.
